# Supplementary material
Source: PubMed Central journal article supplement (PMC5763284)
Supplement: ct7b00779_si_001.pdf [file ct7b00779_si_001.pdf]

# Force Field Parameterization of Metal Ions From Statistical Learning Techniques - SUPPORTING INFORMATION

Francesco Fracchia<sup>a,\*</sup>, Gianluca Del Frate<sup>a</sup>, Giordano Mancini<sup>a</sup>, Walter  
Rocchia<sup>b</sup>, and Vincenzo Barone<sup>a</sup>

E-mail: francesco.fracchia@sns.it

<sup>a</sup>Scuola Normale Superiore, Piazza dei Cavalieri 7, I-56126 Pisa, Italy

<sup>b</sup>Department of Drug Discovery and Development, Istituto Italiano di Tecnologia, 16163  
Genova, Italy

---

\*To whom correspondence should be addressed

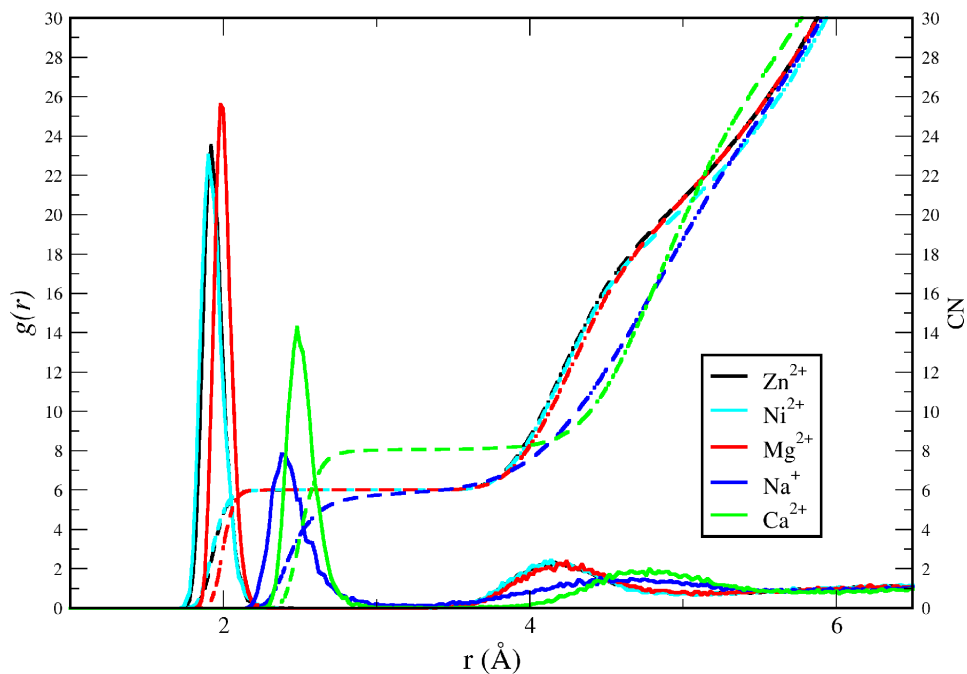

Figure S1: Computed radial distribution functions (rdf, solid lines) and running integration number (dashed lines) for the metal ion-water oxygens interaction in Molecular Dynamics simulations (NVT ensemble, room temperature) using Merz<sup>1</sup> (Zn<sup>2+</sup>), Aqvist<sup>2</sup> (Mg<sup>2+</sup>, Na<sup>+</sup>) and Li et al.<sup>3</sup> (Ni<sup>2+</sup>, Ca<sup>2+</sup>) force fields.

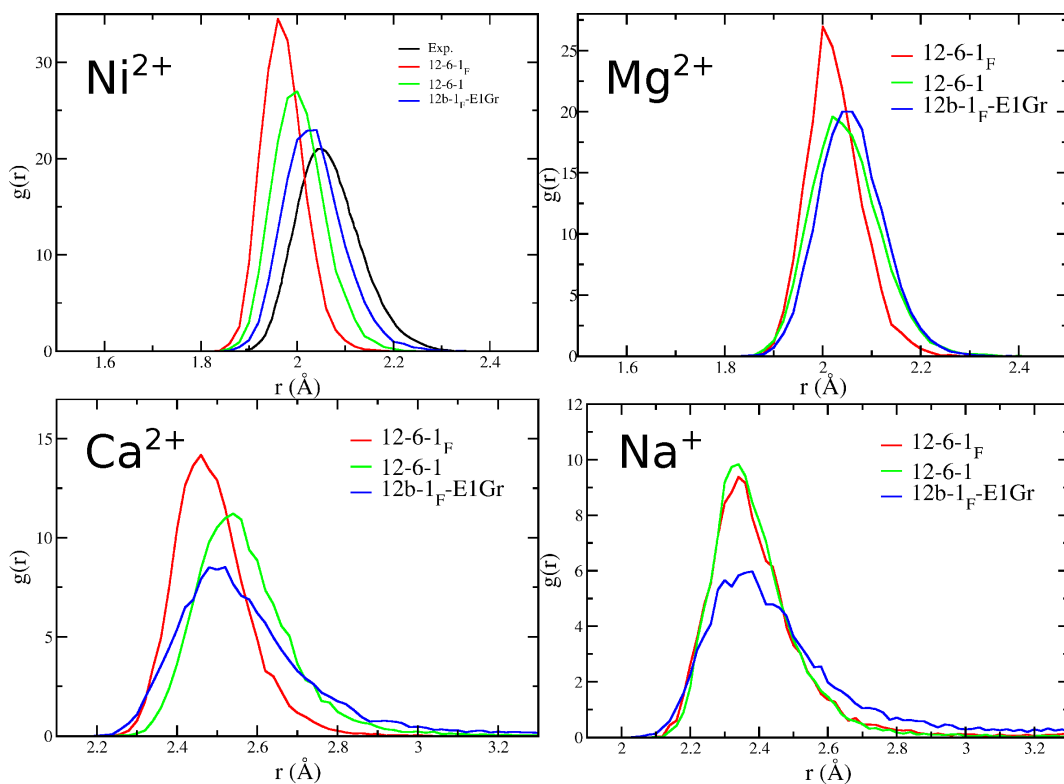

Figure S2: Computed radial distribution function between  $\text{Ni}^{2+}$ ,  $\text{Mg}^{2+}$ ,  $\text{Ca}^{2+}$ ,  $\text{Na}^+$  and water oxygens, using the 12-6-1<sub>F</sub> (red line), 12-6-1 (green) and 12b-1<sub>F</sub>-E1Gr (blue) models. In the case of  $\text{Ni}^{2+}$ , also the experimental distribution (black line) is shown.

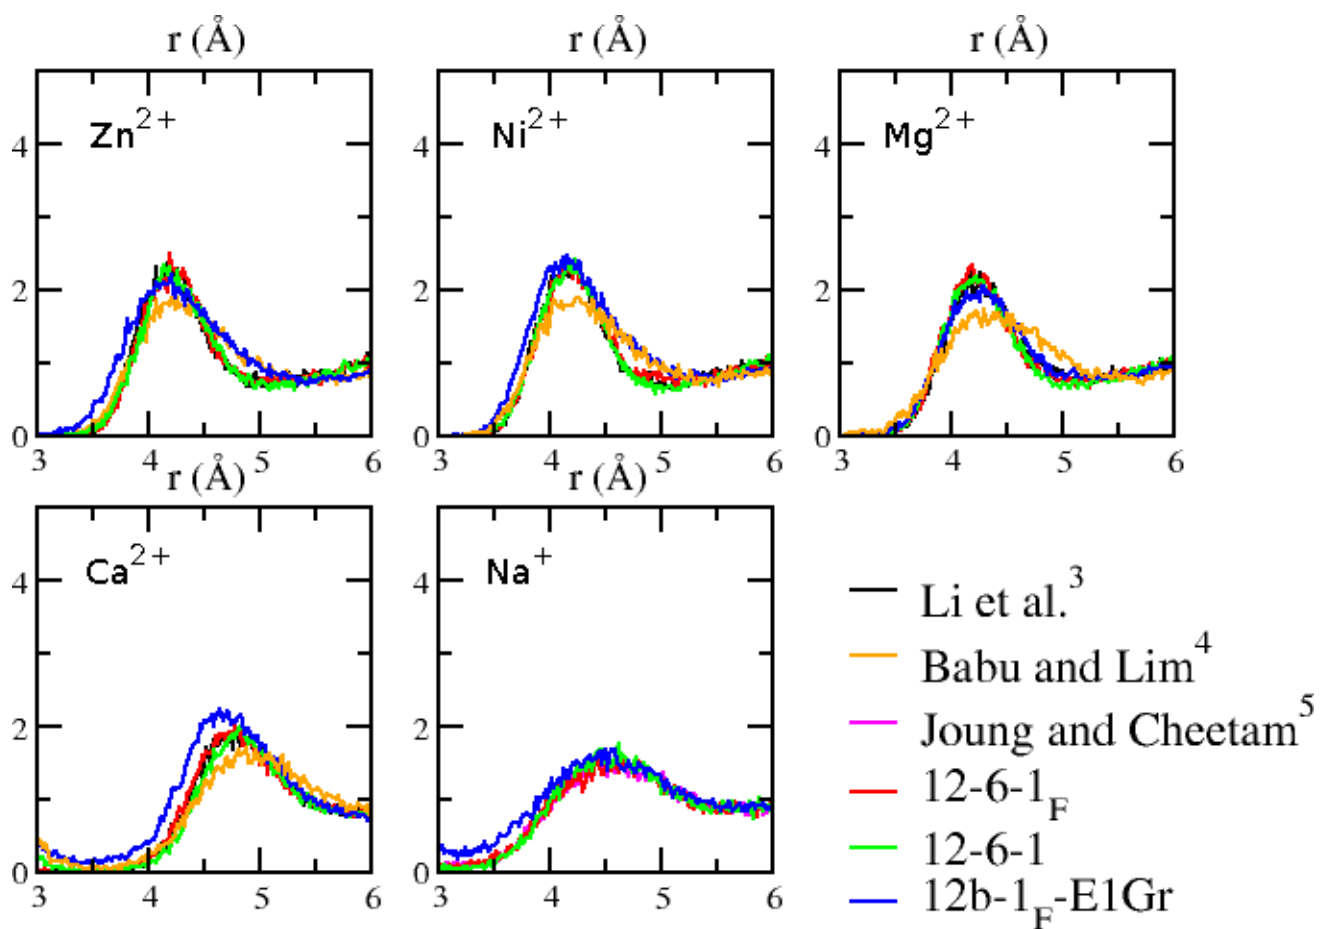

Figure S3: Second peak from radial distribution functions for the metal ion-water oxygens interaction in Molecular Dynamics simulations using the Li<sup>3</sup> (black line,  $\text{Zn}^{2+}$ ,  $\text{Ni}^{2+}$ ,  $\text{Mg}^{2+}$ ,  $\text{Ca}^{2+}$ ), Babu and Lim<sup>4</sup> (orange,  $\text{Zn}^{2+}$ ,  $\text{Ni}^{2+}$ ,  $\text{Mg}^{2+}$ ,  $\text{Ca}^{2+}$ ), Joung and Cheatham<sup>5</sup> (magenta,  $\text{Na}^+$ ), 12-6-1<sub>F</sub> (red), 12-6-1 (green) and 12b-1<sub>F</sub>-E1Gr (blue) models.

Table S1: Metal ions LRR-DE optimized parameters for the 12-6-1<sub>F</sub> model.

|                  | $\sigma$ (Å) | $\epsilon$ (kJ/mol) |
|------------------|--------------|---------------------|
| Zn <sup>2+</sup> | 0.2339341    | 0.028551            |
| Ni <sup>2+</sup> | 0.1145527    | 744.7884            |
| Mg <sup>2+</sup> | 0.1939073    | 0.734308            |
| Na <sup>+</sup>  | 0.2150201    | 1.686356            |
| Ca <sup>2+</sup> | 0.2577062    | 2.029290            |

Table S2: Metal ions LRR-DE optimized parameters for the 12-6-1 model.

|                  | C <sup>-6</sup> (kJ mol <sup>-1</sup> nm <sup>6</sup> ) | C <sup>-12</sup> (kJ mol <sup>-1</sup> nm <sup>12</sup> ) | q (e)    |
|------------------|---------------------------------------------------------|-----------------------------------------------------------|----------|
| Zn <sup>2+</sup> | -0.004349                                               | 3.405e-08                                                 | 2.300773 |
| Ni <sup>2+</sup> | -0.000057                                               | 1.232e-07                                                 | 2.213392 |
| Mg <sup>2+</sup> | -0.005197                                               | 3.344e-08                                                 | 2.321638 |
| Na <sup>+</sup>  | 0.000620                                                | 3.689e-07                                                 | 1.021000 |
| Ca <sup>2+</sup> | -0.008399                                               | 6.562e-07                                                 | 2.271904 |

Table S3: Metal ions LRR-DE optimized parameters for the 12b-1-E1Gr model.

|                  | C1 (kJ mol <sup>-1</sup> nm <sup>12</sup> ) | C2 (e)     | $\theta_1$ (nm) | $\theta_2$ (nm <sup>-1</sup> ) | $\theta_3$ (nm <sup>-2</sup> ) | $\theta_4$ (nm) |
|------------------|---------------------------------------------|------------|-----------------|--------------------------------|--------------------------------|-----------------|
| Zn <sup>2+</sup> | 2.912e-05                                   | 696.482913 | -0.099025       | 15.281931                      | 0.270012                       | 0.126974        |
| Ni <sup>2+</sup> | 4.1724190                                   | 4.9229e-07 | -0.021800       | 10.000000                      | 7.000000                       | 0.100000        |
| Mg <sup>2+</sup> | -22.109731                                  | -91.616616 | -0.795994       | 20.000000                      | 10.000000                      | 0.270071        |
| Na <sup>+</sup>  | 5.782e-06                                   | 2.4124543  | -0.057371       | 8.4124410                      | 6.089116                       | 0.182687        |
| Ca <sup>2+</sup> | 1.085e-04                                   | 11.3382033 | -0.101856       | 10.1049636                     | 8.342623                       | 0.218861        |

## References

- (1) Hoops, S. C.; Anderson, K. W.; Merz Jr, K. M. *Journal of the American Chemical Society* **1991**, *113*, 8262–8270.
- (2) Aqvist, J. *J. Phys. Chem.* **1990**, *94*, 8021–8024.
- (3) Li, P.; Roberts, B. P.; Chakravorty, D. K.; Merz Jr, K. M. *J. Chem. Theory Comput.* **2013**, *9*, 2733–2748.
- (4) Babu, C. S.; Lim, C. *The Journal of Physical Chemistry A* **2006**, *110*, 691–699.
- (5) Joung, I. S.; Cheatham III, T. E. *J. Phys. Chem. B* **2008**, *112*, 9020–9041.
